# Supplementary material for: Ultra-purified alginate gel implantation decreases inflammatory cytokine levels, prevents intervertebral disc degeneration, and reduces acute pain after discectomy
Source: PubMed Central journal article supplement (PMC7804289; doi:10.1038/s41598-020-79958-9), 2021-01-12
Supplement: 41598_2020_79958_MOESM1_ESM.pdf [file 41598_2020_79958_MOESM1_ESM.pdf]

**Ultra-purified alginate gel implantation decreases inflammatory cytokine levels, prevents intervertebral disc degeneration, and reduces acute pain after discectomy**

Katsuro Ura<sup>1</sup>, Katsuhisa Yamada<sup>1\*</sup>, Takeru Tsujimoto<sup>1</sup>, Daisuke Ukeba<sup>1</sup>, Norimasa Iwasaki<sup>1</sup>, Hideki Sudo<sup>2\*</sup>

<sup>1</sup> Department of Orthopedic Surgery, Faculty of Medicine and Graduate of Medicine, Hokkaido University, Sapporo, Hokkaido, Japan

<sup>2</sup> Department of Advanced Medicine for Spine and Spinal Cord Disorders, Faculty of Medicine and Graduate of Medicine, Hokkaido University, Sapporo, Hokkaido, Japan

**\*Corresponding Author:**

Katsuhisa Yamada, MD, PhD, Department of Orthopedic Surgery, Faculty of Medicine and Graduate of Medicine, Hokkaido University, N15W7, Sapporo, Hokkaido 060-8638, Japan; Tel: 81-11-706-5934, Fax: 81-11-706-6054, E-mail: yka2q@yahoo.co.jp

Hideki Sudo, MD, PhD, Department of Advanced Medicine for Spine and Spinal Cord Disorders, Faculty of Medicine and Graduate of Medicine, Hokkaido University, N15W7, Sapporo, Hokkaido 060-8638, Japan; Tel: 81-11-706-5934, Fax: 81-11-706-6054, E-mail: hidekisudo@yahoo.co.jp

**TNF- $\alpha$** **IL-6****TrkA****Rat**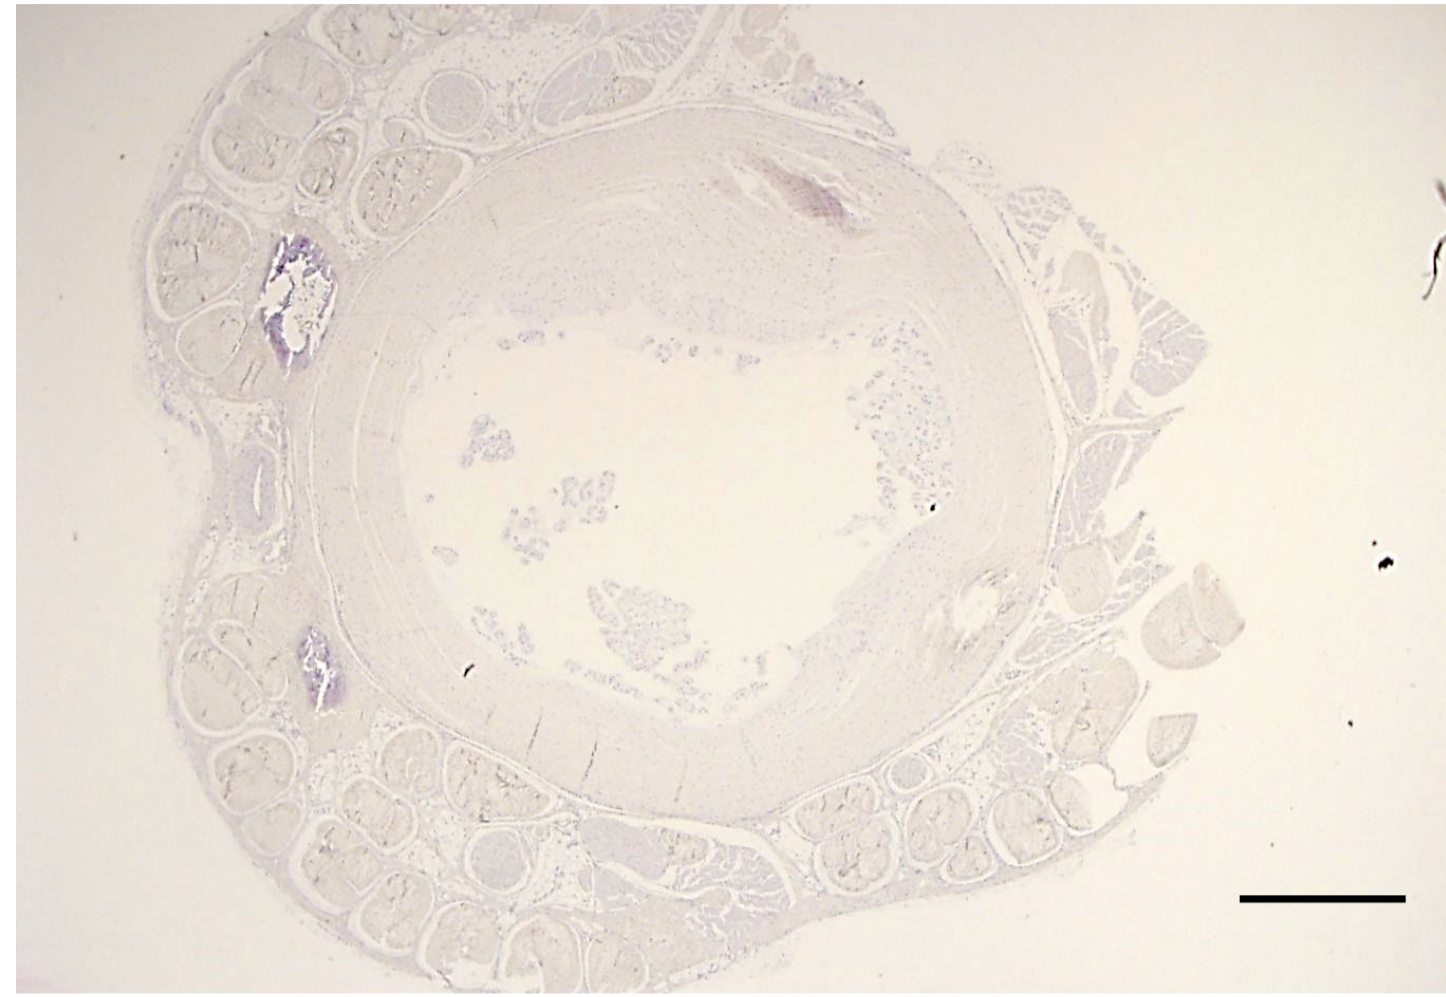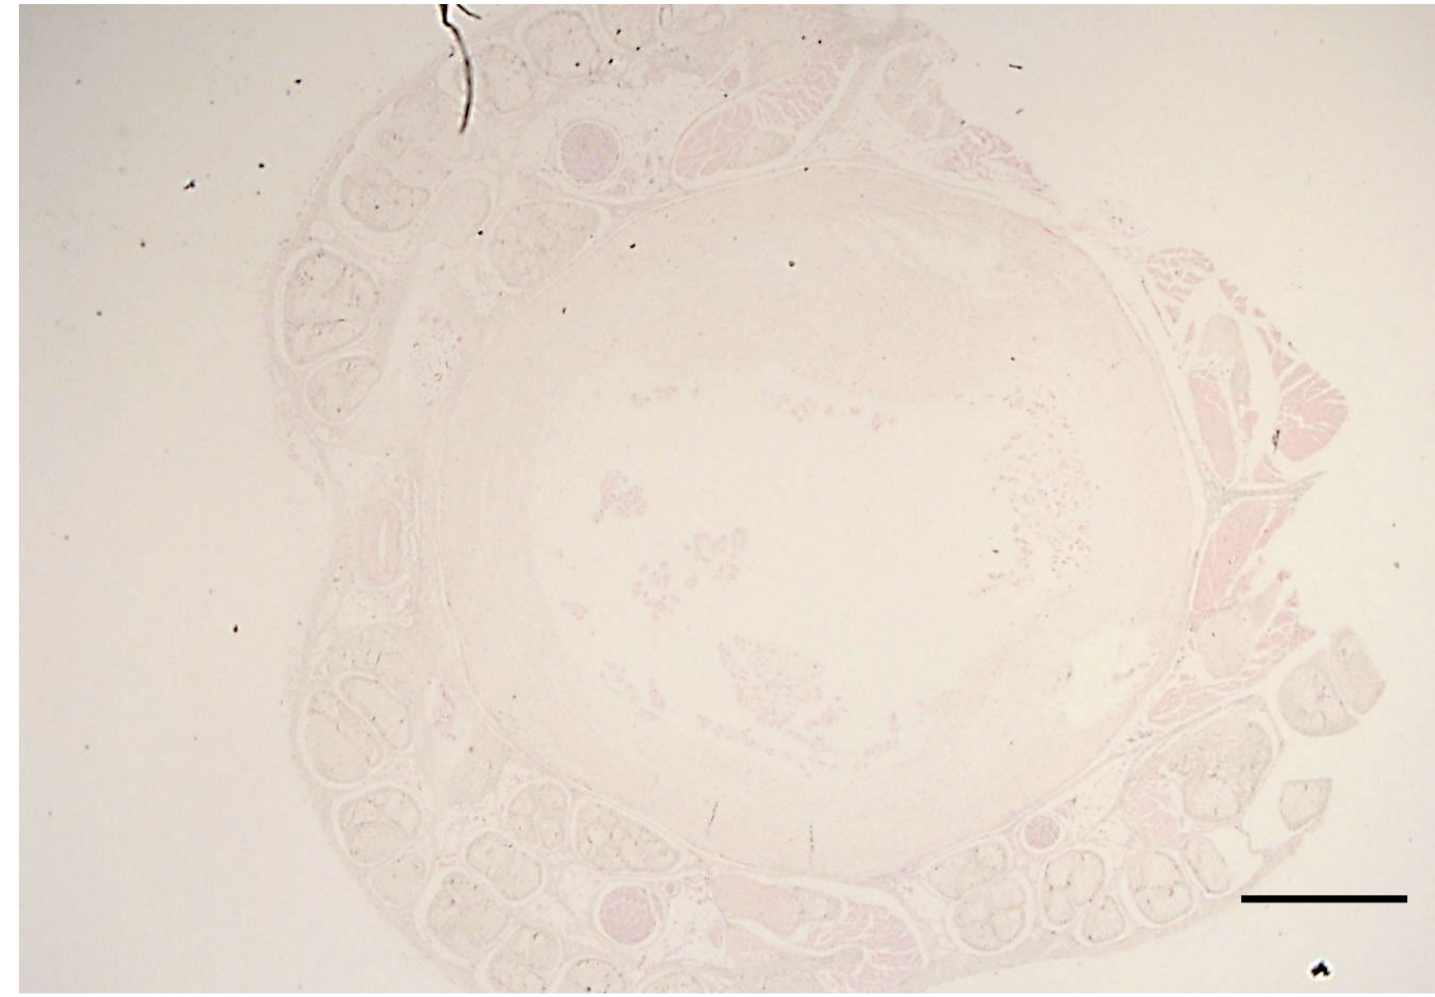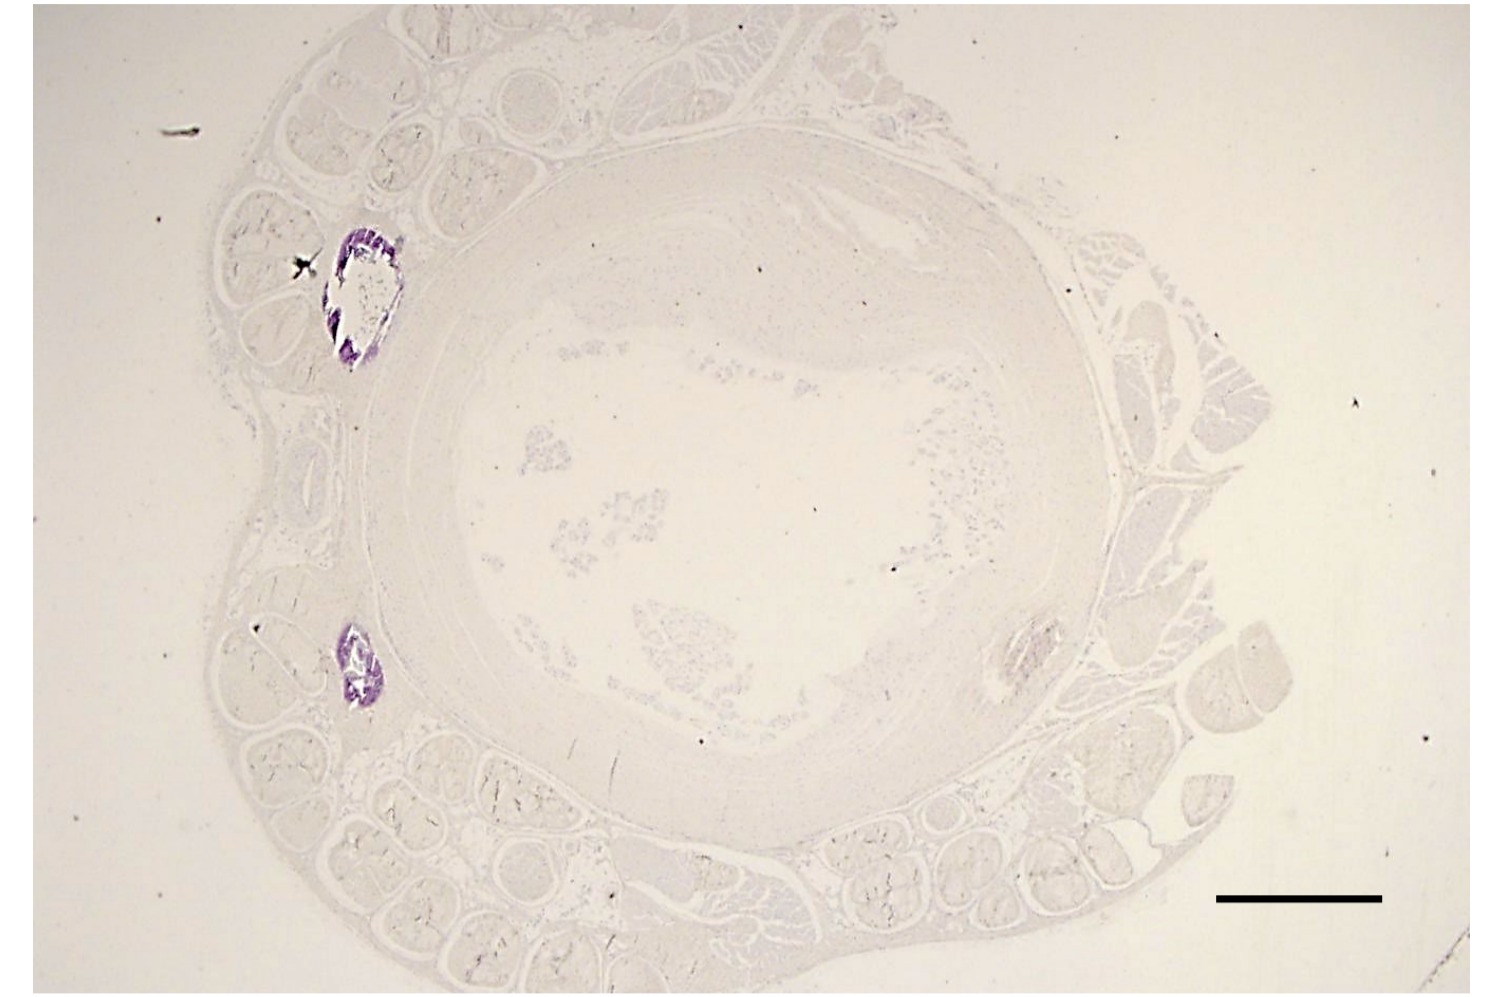**Rabbit**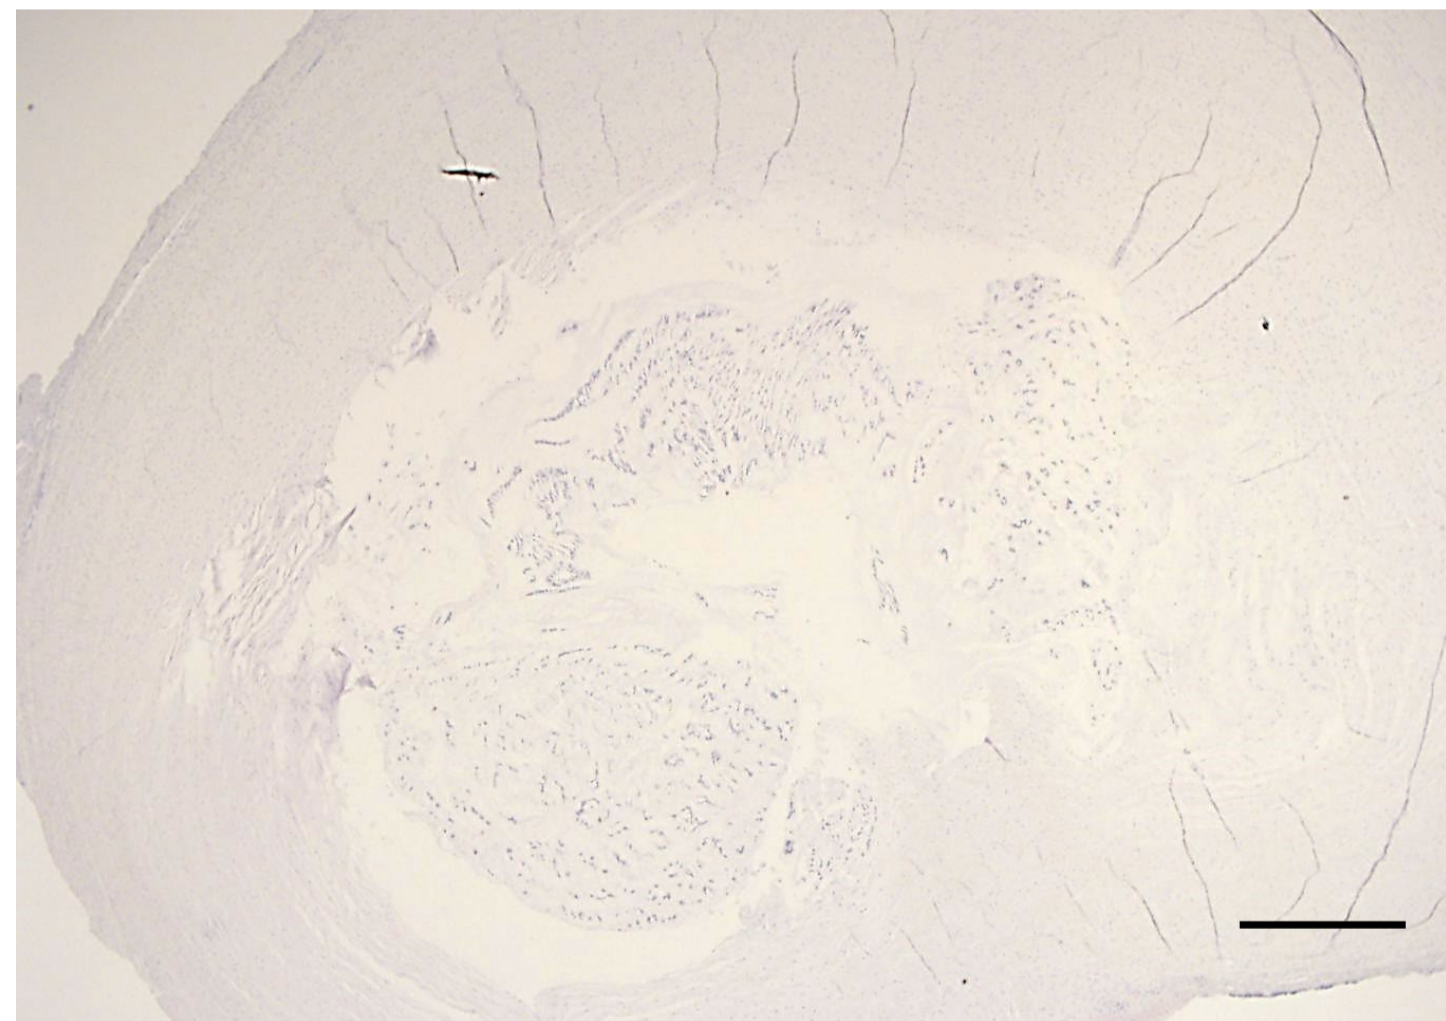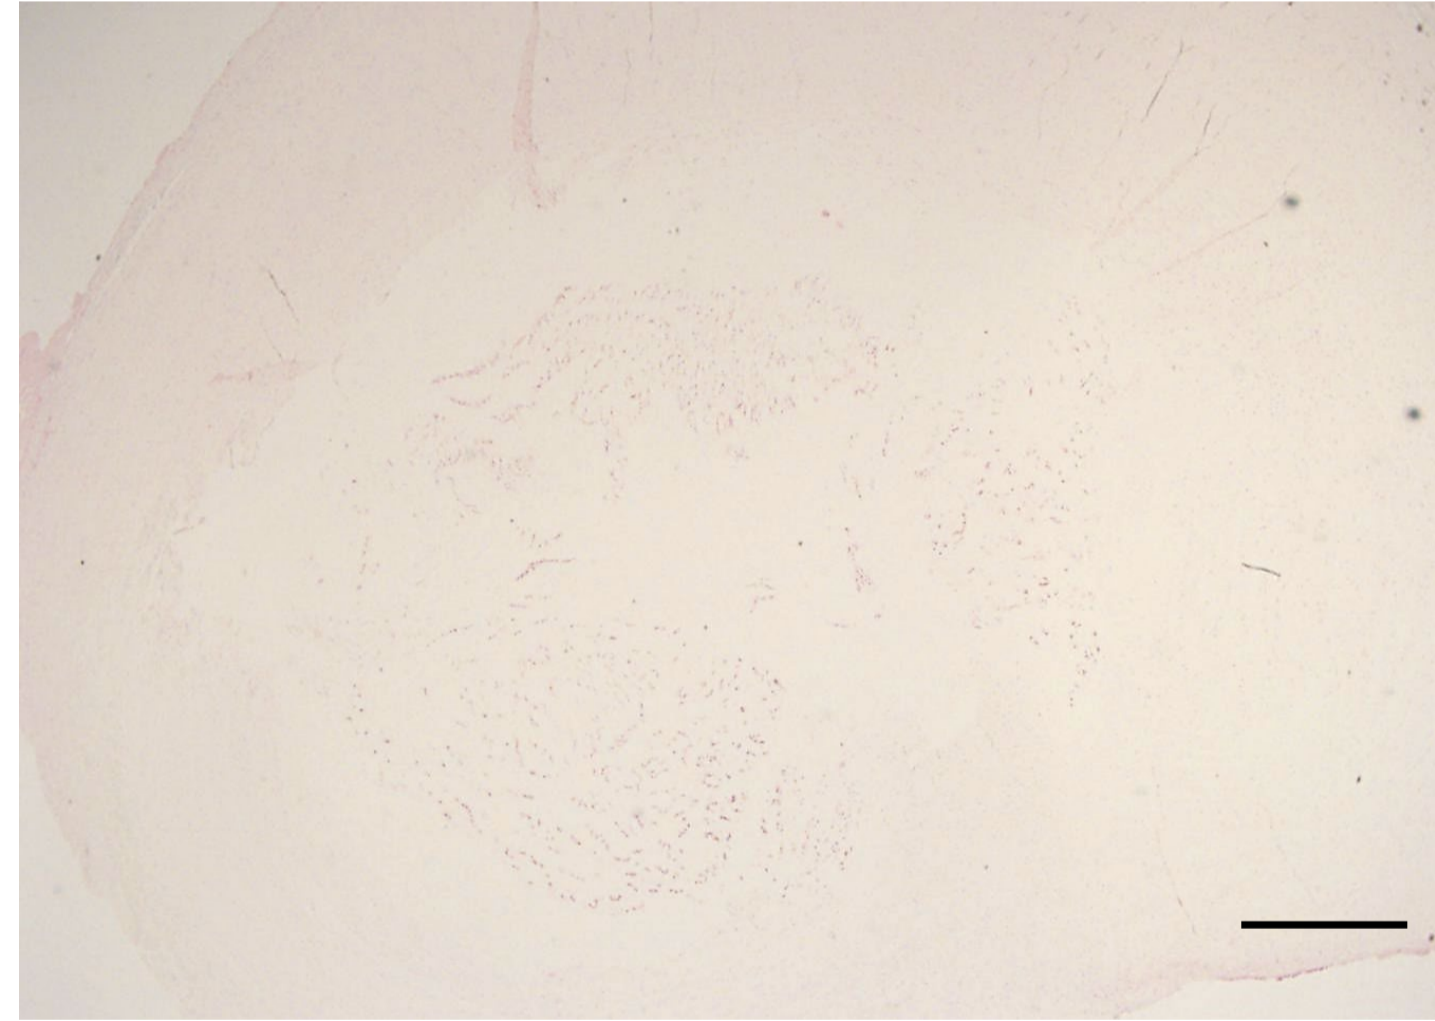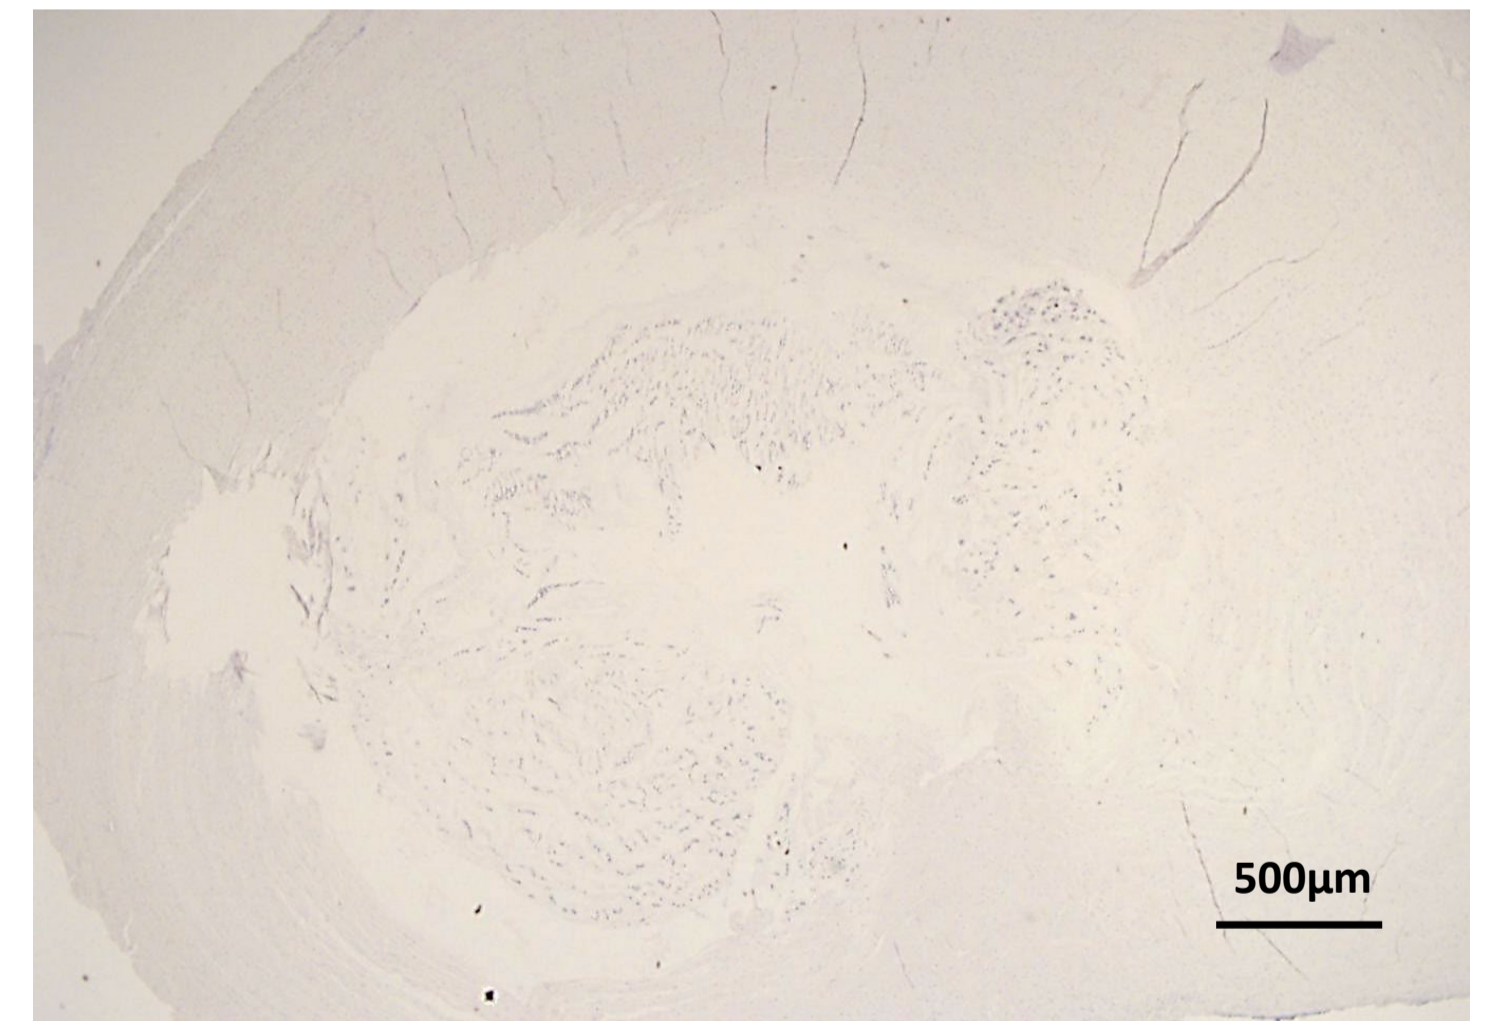

**Supplementary fig. 1** Negative controls for TNF- $\alpha$ , IL-6 and TrkA in immunohistochemistry. TNF- $\alpha$  -positive cells are stained red and nuclei was stained purple using hematoxylin. IL-6 -positive cells are stained green and nuclei was stained red using nuclear fast red. TrkA -positive cells are stained brown and nuclei was stained purple using hematoxylin. Scale bar, 500  $\mu$ m.

**Supplementary Table 1. Histological grading**

| Category                   | Score |             |             |
|----------------------------|-------|-------------|-------------|
|                            | Sham  | Punch       | Gel         |
| Endplate                   | 0     | 0.67 ± 0.47 | 0.17 ± 0.37 |
| AF                         | 0     | 1           | 0.33 ± 0.47 |
| Boundary between NP and AF | 0     | 1.67 ± 0.47 | 0.17 ± 0.37 |
| Cellularity of NP          | 0     | 2           | 0.5 ± 0.5   |
| Matrix NP(H&E)             | 0     | 2           | 0.5 ± 0.5   |
| Matrix NP(SO)              | 0     | 2           | 0           |
| Total score                | 0     | 9.33 ± 0.94 | 1.67 ± 1.89 |

N = 6 discs in each group, mean ± standard deviation. NP; nucleus pulposus. AF; annulus fibrosus. H&E; hematoxylin and eosin. SO; safranin O
